# Supplementary material for: Copeptin, Natriuretic Peptides, and Cardiovascular Outcomes in Patients With CKD: The German Chronic Kidney Disease (GCKD) Study
Source: PubMed Central journal article supplement — Kidney Med. 2023 Sep 17;5(11):100725. doi: 10.1016/j.xkme.2023.100725 (PMC10616426; doi:10.1016/j.xkme.2023.100725), 2023-09-17
Supplement: mmc1.pdf [file mmc1.pdf]

**Figure S1.** Cumulative incidence of non-CV death (panel A), CV death (panel B), MACE (panel C) and HHF (panel D) according to Copeptin level quintile derived from the unadjusted cause-specific hazard estimates (model A) by application of the Aalen-Johansen estimator

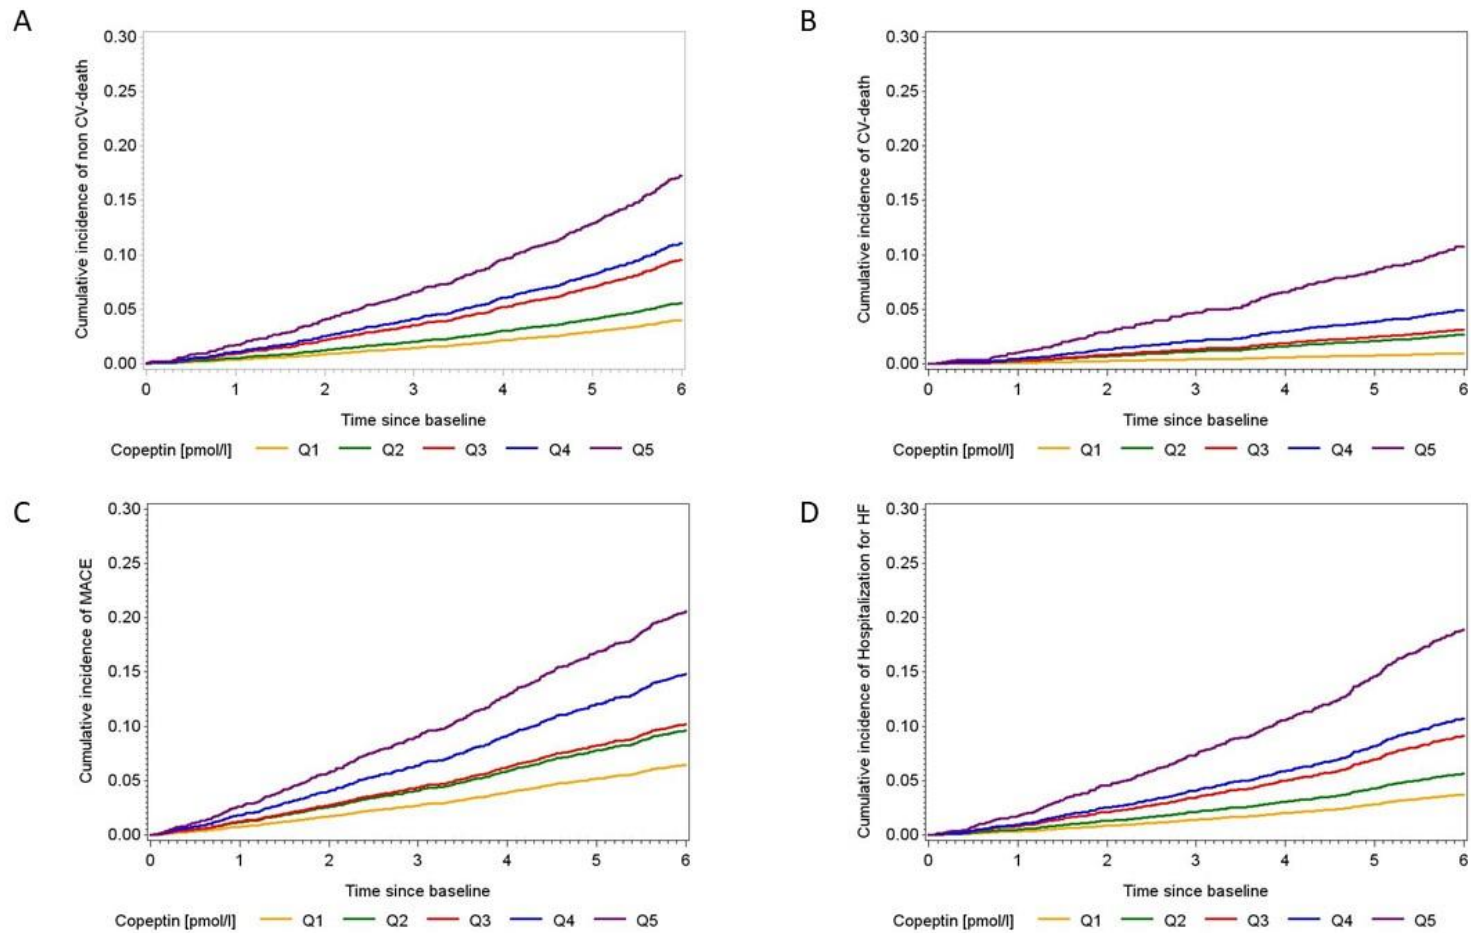

**Figure S2.** Cumulative incidence of non-CV death (panel A), CV death (panel B), MACE (panel C) and HHF (panel D) according to MR-proANP level quintile derived from the unadjusted cause-specific hazard estimates (model A) by application of the Aalen-Johansen estimator

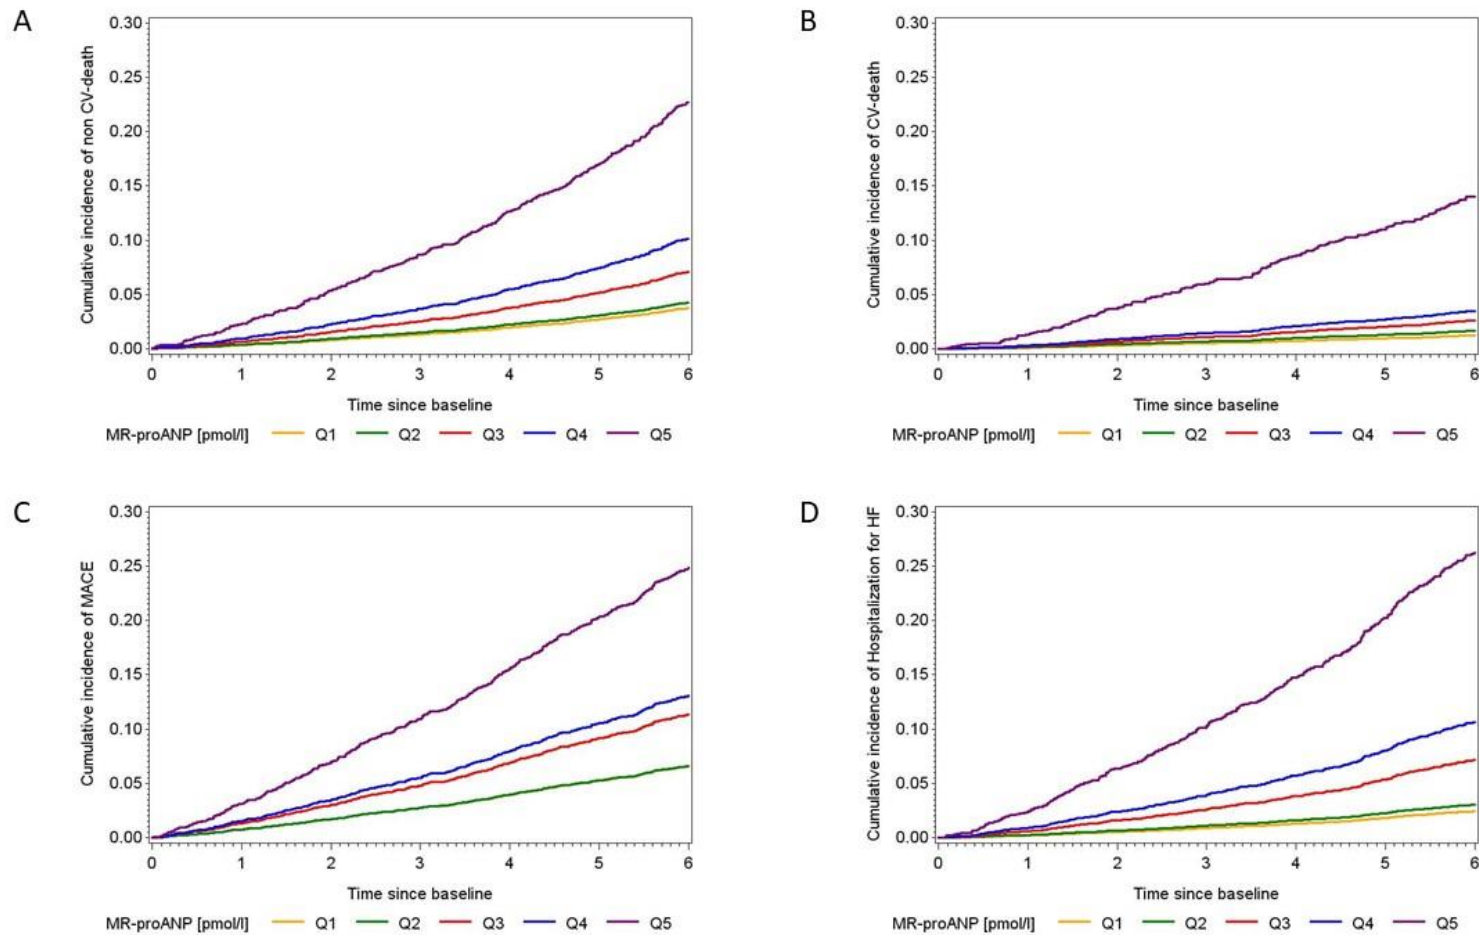

**Figure S3.** Cumulative incidence of non-CV death (panel A), CV death (panel B), MACE (panel C) and HHF (panel D) according to NT-proBNP level quintile derived from the unadjusted cause-specific hazard estimates (model A) by application of the Aalen-Johansen estimator

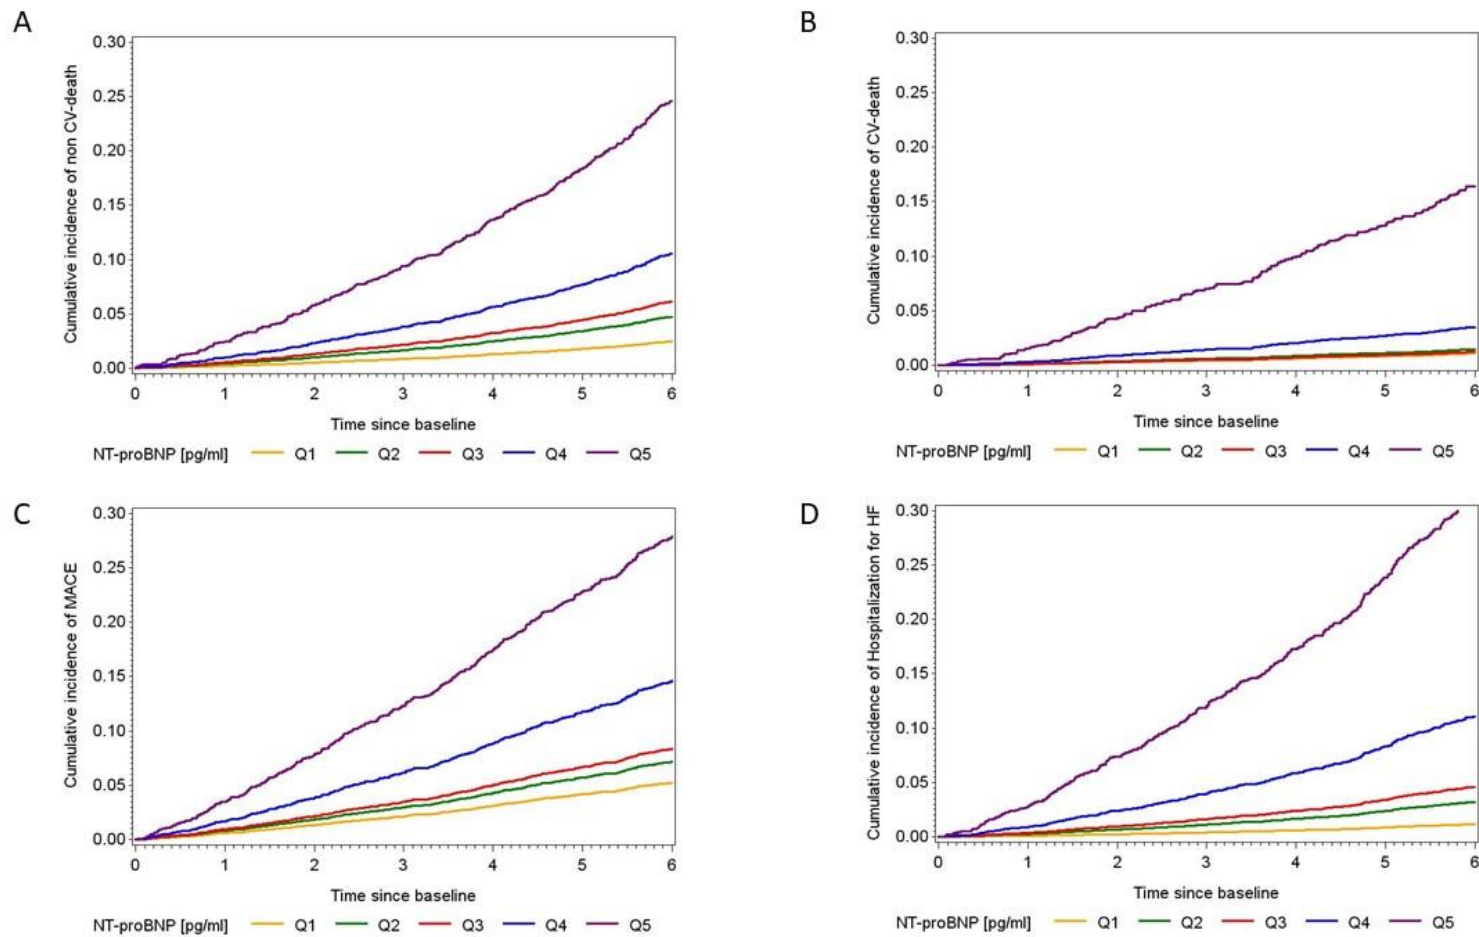

**Table S1 Demographics and clinical parameters at baseline stratified by MR-proANP quintiles**

|                                        | Total Cohort | MR-proANP (pmol/l) |                      |                       |                       |                    |
|----------------------------------------|--------------|--------------------|----------------------|-----------------------|-----------------------|--------------------|
|                                        |              | Q1<br>(≤ 69)       | Q2<br>(> 69 - ≤ 102) | Q3<br>(> 102 - ≤ 144) | Q4<br>(> 144 - ≤ 213) | Q5<br>(> 213)      |
| N (%)                                  | 4417         | 843 (19.1)         | 883 (20.0)           | 891 (20.2)            | 899 (20.4)            | 901 (20.4)         |
| <b>Demographics</b>                    |              |                    |                      |                       |                       |                    |
| Age (ys)                               | 61 ± 12      | 53.4 ± 13.4        | 57.9 ± 11.4          | 61.9 ± 10.5           | 64.0 ± 9.0            | 66.0 ± 8.2         |
| Male                                   | 2681 (61)    | 534 (63)           | 502 (57)             | 501 (56)              | 546 (61)              | 598 (66)           |
| Regional center                        |              |                    |                      |                       |                       |                    |
| AA – Aachen                            | 446 (10)     | 76 (9)             | 74 (8)               | 91 (10)               | 95 (11)               | 110 (12)           |
| BE – Berlin                            | 372 (8)      | 63 (7)             | 68 (8)               | 69 (8)                | 87 (10)               | 85 (9)             |
| ER - Erlangen                          | 801 (18)     | 182 (22)           | 160 (18)             | 163 (18)              | 139 (15)              | 157 (17)           |
| FR – Freiburg                          | 300 (7)      | 60 (7)             | 71 (8)               | 512 (6)               | 62 (7)                | 56 (6)             |
| HA - Hannover                          | 376 (8)      | 76 (9)             | 72 (8)               | 78 (9)                | 74 (8)                | 76 (8)             |
| HE – Heidelberg                        | 404 (9)      | 68 (8)             | 79 (9)               | 74 (8)                | 94 (10)               | 89 (10)            |
| JE – Jena                              | 575 (13)     | 91 (11)            | 123 (14)             | 126 (14)              | 113 (13)              | 122 (14)           |
| MU – München                           | 425 (10)     | 96 (11)            | 88 (10)              | 100 (11)              | 83 (9)                | 58 (6)             |
| WU - Würzburg                          | 718 (16)     | 131 (16)           | 148 (17)             | 139 (16)              | 152 (17)              | 148 (16)           |
| <b>Laboratory Measures</b>             |              |                    |                      |                       |                       |                    |
| eGFR (ml/min per 1.73 m <sup>2</sup> ) | 49 ± 17      | 60.8 ± 22.0        | 53.2 ± 16.2          | 48.3 ± 14.4           | 43.9 ± 12.6           | 38.8 ± 11.3        |
| UACR (mg/g)                            | 47 (9-366)   | 52.4 (7.5-498.6)   | 33.9 (6.7-284.0)     | 30.6 (8.8-218.2)      | 46.5 (9.8-309.7)      | 85.8 (15.8-562.7)  |
| hsCRP (mg/dl)                          | 2 (1-5)      | 1.9 (1.0-4.4)      | 2.1 (1.0-4.8)        | 2.2 (1.0-4.7)         | 2.4 (1.1-5.3)         | 2.9 (1.3-6.6)      |
| LDL cholesterol (mg/dl)                | 113 (88-143) | 122.6 (96.1-149.6) | 118.1 (93.5-142.7)   | 114.0 (88.6-145.9)    | 107.8 (85.5-136.9)    | 103.9 (81.3-133.7) |
| HDL cholesterol (mg/dl)                | 48 (39-60)   | 47.2 (38.3-59.2)   | 48.7 (39.5-60.9)     | 49.3 (40.3-61.5)      | 48.3 (38.9-61.6)      | 47.5 (38.6-61.1)   |
| <b>CVD risk factors</b>                |              |                    |                      |                       |                       |                    |
| Systolic BP (mmHg)                     | 140 ± 21     | 135.0 ± 17.1       | 138.3 ± 18.1         | 139.5 ± 19.5          | 142.9 ± 21.2          | 142.9 ± 24.3       |
| Diastolic BP (mmHg)                    | 79 ± 12      | 81.4 ± 10.9        | 81.0 ± 10.9          | 79.2 ± 11.4           | 78.1 ± 11.9           | 75.9 ± 12.9        |
| BMI (kg/m <sup>2</sup> )               | 30 ± 6       | 29.8 ± 5.9         | 29.5 ± 5.9           | 30.1 ± 6.1            | 30.1 ± 5.7            | 30.4 ± 6.2         |
| Diabetes                               | 1645 (37)    | 235 (28)           | 274 (31)             | 345 (39)              | 369 (41)              | 422 (47)           |
| Previous CVD                           | 1180 (27)    | 95 (11)            | 154 (17)             | 199 (22)              | 327 (36)              | 405 (45)           |

|                       |           |          |          |          |          |          |
|-----------------------|-----------|----------|----------|----------|----------|----------|
| Heart Failure         | 836 (19)  | 80 (9)   | 104 (12) | 140 (16) | 219 (24) | 293 (33) |
| Smoking history       |           |          |          |          |          |          |
| never                 | 1813 (41) | 336 (40) | 363 (41) | 396 (44) | 376 (42) | 342 (38) |
| former                | 1918 (44) | 334 (40) | 362 (41) | 377 (42) | 394 (44) | 451 (50) |
| current               | 673 (15)  | 170 (20) | 155 (18) | 115 (13) | 126 (14) | 107 (12) |
| <b>Medication Use</b> |           |          |          |          |          |          |
| RASi                  | 3713 (84) | 704 (84) | 724 (82) | 729 (82) | 784 (87) | 772 (86) |
| Statins               | 2155 (49) | 324 (38) | 379 (43) | 428 (48) | 492 (55) | 532 (59) |
| Anti-platelet agents  | 1564 (36) | 173 (21) | 266 (30) | 329 (37) | 405 (45) | 391 (43) |
| Beta-blockers         | 2480 (57) | 238 (28) | 374 (42) | 492 (55) | 653 (73) | 723 (80) |
| MRA                   | 364 (8)   | 57 (7)   | 56 (6)   | 68 (8)   | 73 (8)   | 110 (12) |

**Continuous variables are presented as mean and standard deviation or median and interquartile range.**

**Categorical variables are presented as numbers with percentages in the overall study population.**

eGFR=estimated glomerular filtration rate, UACR=urinary albumin excretion rate, hsCRP=high sensitive C-reactive protein, LDL=low density lipoprotein, HDL=high density lipoprotein, BP=blood pressure, BMI=body mass index, CVD=cardiovascular disease, RASi=renin angiotensin system inhibitor, MRA=mineralocorticoid receptor antagonist

**Table S2: Demographics and clinical parameters at baseline stratified by NT-proBNP quintiles**

|                                        | NT-proBNP (pg/ml) |                    |                      |                       |                       |                    |
|----------------------------------------|-------------------|--------------------|----------------------|-----------------------|-----------------------|--------------------|
|                                        | Total Cohort      | Q1<br>(≤ 74)       | Q2<br>(> 74 - ≤ 136) | Q3<br>(> 136 - ≤ 250) | Q4<br>(> 250 - ≤ 532) | Q5<br>(> 532)      |
| N (%)                                  | 4417              | 879 (19.9)         | 868 (19.7)           | 873 (19.8)            | 902 (20.4)            | 895 (20.3)         |
| <b>Demographics</b>                    |                   |                    |                      |                       |                       |                    |
| Age (ys)                               | 61 ± 12           | 53.8 ± 12.9        | 59.2 ± 11.4          | 61.1 ± 11.3           | 63.6 ± 9.8            | 65.9 ± 8.0         |
| Male                                   | 2681 (61)         | 617 (70)           | 503 (58)             | 484 (55)              | 495 (55)              | 582 (65)           |
| Reginal center                         |                   |                    |                      |                       |                       |                    |
| AA – Aachen                            | 446 (10)          | 90 (10)            | 86 (10)              | 83 (10)               | 87 (10)               | 100 (11)           |
| BE – Berlin                            | 372 (8)           | 63 (7)             | 61 (7)               | 79 (9)                | 96 (11)               | 73 (8)             |
| ER - Erlangen                          | 801 (18)          | 177 (20)           | 160 (18)             | 152 (17)              | 145 (16)              | 167 (19)           |
| FR – Freiburg                          | 300 (7)           | 60 (7)             | 56 (6)               | 48 (6)                | 70 (8)                | 66 (7)             |
| HA - Hannover                          | 376 (9)           | 87 (10)            | 73 (8)               | 75 (9)                | 75 (8)                | 66 (7)             |
| HE – Heidelberg                        | 404 (9)           | 75 (9)             | 72 (8)               | 95 (11)               | 80 (9)                | 82 (9)             |
| JE – Jena                              | 575 (13)          | 92 (10)            | 118 (14)             | 118 (14)              | 116 (13)              | 131 (15)           |
| MU – München                           | 425 (10)          | 96 (11)            | 96 (11)              | 87 (10)               | 87 (10)               | 80 (9)             |
| WU - Würzburg                          | 718 (16)          | 139 (16)           | 146 (17)             | 136 (16)              | 167 (19)              | 130 (15)           |
| <b>Laboratory Measures</b>             |                   |                    |                      |                       |                       |                    |
| eGFR (ml/min per 1.73 m <sup>2</sup> ) | 49 ± 17           | 58.4 ± 21.0        | 51.3 ± 16.9          | 48.3 ± 14.9           | 45.5 ± 14.9           | 40.7 ± 13.0        |
| UACR (mg/g)                            | 47 (9-366)        | 52.4 (7.2-416.4)   | 37.3 (7.0-276.9)     | 34.8 (8.5-318.9)      | 41.6 (9.9-305.7)      | 77.3 (15.5-531.5)  |
| hsCRP (mg/dl)                          | 2 (1-5)           | 1.7 (0.8-3.8)      | 2.1 (1.0-4.7)        | 2.2 (1.0-4.5)         | 2.6 (1.1-5.4)         | 3.2 (1.5-7.9)      |
| LDL cholesterol (mg/dl)                | 113 (88-143)      | 122.7 (94.9-148.0) | 118.2 (94.4-147.3)   | 113.5 (90.2-142.7)    | 110.5 (86.1-140.5)    | 101.8 (80.3-131.2) |
| HDL cholesterol (mg/dl)                | 48 (39-60)        | 46.8 (38.1-57.4)   | 48.7 (40.3-60.9)     | 49.8 (40.7-62.4)      | 49.2 (40.6-62.8)      | 47.0 (37.3-59.8)   |
| <b>CVD risk factors</b>                |                   |                    |                      |                       |                       |                    |
| Systolic BP (mmHg)                     | 140 ± 21          | 134.8 ± 16.3       | 137.9 ± 19.1         | 138.8 ± 18.8          | 143.1 ± 21.6          | 143.0 ± 24.4       |
| Diastolic BP (mmHg)                    | 79 ± 12           | 81.4 ± 10.4        | 80.7 ± 11.6          | 78.9 ± 11.4           | 78.3 ± 12.1           | 76.3 ± 12.6        |
| BMI (kg/m <sup>2</sup> )               | 30 ± 6            | 29.8 ± 5.7         | 29.8 ± 6.1           | 29.5 ± 5.9            | 30.0 ± 6.1            | 30.5 ± 6.2         |
| Diabetes                               | 1645 (37)         | 250 (28)           | 258 (30)             | 316 (36)              | 345 (38)              | 476 (53)           |
| Previous CVD                           | 1180 (27)         | 92 (10)            | 144 (17)             | 190 (22)              | 314 (35)              | 440 (49)           |
| Heart Failure                          | 836 (19)          | 68 (8)             | 106 (12)             | 126 (14)              | 210 (23)              | 326 (36)           |
| Smoking history                        |                   |                    |                      |                       |                       |                    |
| never                                  | 1813 (41)         | 350 (40)           | 366 (42)             | 391 (45)              | 384 (43)              | 322 (36)           |
| former                                 | 1918 (44)         | 371 (42)           | 362 (42)             | 369 (42)              | 376 (42)              | 440 (49)           |
| current                                | 673 (15)          | 157 (18)           | 138 (16)             | 108 (12)              | 140 (16)              | 130 (15)           |
| <b>Medication Use</b>                  |                   |                    |                      |                       |                       |                    |
| RASi                                   | 3713 (84)         | 739 (84)           | 724 (83)             | 711 (81)              | 778 (86)              | 761 (85)           |
| Statins                                | 2155 (49)         | 349 (40)           | 391 (45)             | 403 (46)              | 485 (54)              | 527 (59)           |
| Anti-platelet agents                   | 1564 (36)         | 180 (20)           | 253 (29)             | 332 (38)              | 400 (44)              | 399 (45)           |
| Beta-blockers                          | 2480 (57)         | 263 (30)           | 376 (43)             | 499 (57)              | 624 (69)              | 718 (80)           |
| MRA                                    | 364 (8)           | 53 (6)             | 50 (6)               | 53 (6)                | 79 (9)                | 129 (14)           |

Continuous variables are presented as mean and standard deviation or median and interquartile range.

Categorical variables are presented as numbers with percentages in the overall study population.

eGFR=estimated glomerular filtration rate, UACR=urinary albumin excretion rate, hsCRP=high sensitive C-reactive protein, LDL=low density lipoprotein, HDL=high density lipoprotein, BP=blood pressure, BMI=body mass index, CVD=cardiovascular disease, RASi=renin angiotensin system inhibitor, MRA=mineralocorticoid receptor antagonist

**Table S3 Models A and Models B for Copeptin (showing all included variables)**

|                                        |                | Non-cardiovascular death | Cardiovascular death | Major adverse cardiovascular event | Hospitalization for Heart Failure |
|----------------------------------------|----------------|--------------------------|----------------------|------------------------------------|-----------------------------------|
|                                        |                | HR (95% CI)              | HR (95% CI)          | HR (95% CI)                        | HR (95% CI)                       |
| <b>Adjusted model A<sup>a</sup></b>    |                |                          |                      |                                    |                                   |
| Copeptin HR per SD increase            |                | 1.31 [1.24; 1.39]        | 1.39 [1.28; 1.49]    | 1.24 [1.16; 1.32]                  | 1.35 [1.28; 1.43]                 |
| Age (ys)                               |                | 1.07 [1.06; 1.09]        | 1.08 [1.06; 1.11]    | 1.05 [1.04; 1.06]                  | 1.08 [1.06; 1.09]                 |
| gender                                 | female         | 0.70 [0.56; 0.87]        | 0.47 [0.32; 0.69]    | 0.54 [0.44; 0.66]                  | 0.80 [0.64; 0.99]                 |
| Copeptin (pmol/l)                      | Q2             | 1.27 [0.82; 1.96]        | 2.29 [1.02; 5.17]    | 1.31 [0.94; 1.85]                  | 1.42 [0.90; 2.25]                 |
|                                        | Q3             | 2.10 [1.40; 3.13]        | 2.49 [1.12; 5.54]    | 1.29 [0.92; 1.82]                  | 2.27 [1.48; 3.47]                 |
|                                        | Q4             | 2.35 [1.58; 3.49]        | 3.68 [1.70; 7.95]    | 1.81 [1.30; 2.51]                  | 2.60 [1.72; 3.95]                 |
|                                        | Q5             | 3.70 [2.54; 5.41]        | 8.08 [3.86; 16.87]   | 2.54 [1.86; 3.48]                  | 4.72 [3.18; 7.02]                 |
| Age (ys)                               |                | 1.07 [1.06; 1.08]        | 1.08 [1.06; 1.10]    | 1.05 [1.04; 1.06]                  | 1.07 [1.06; 1.09]                 |
| gender                                 | female         | 0.76 [0.60; 0.95]        | 0.54 [0.38; 0.78]    | 0.57 [0.46; 0.70]                  | 0.87 [0.70; 1.09]                 |
| <b>Adjusted model B<sup>b</sup></b>    |                |                          |                      |                                    |                                   |
| Copeptin HR per SD increase            |                | 1.19 [1.08; 1.32]        | 1.29 [1.12; 1.48]    | 1.10 [1.00; 1.21]                  | 1.30 [1.18; 1.43]                 |
| Age (ys)                               |                | 1.06 [1.04; 1.08]        | 1.05 [1.02; 1.08]    | 1.03 [1.02; 1.04]                  | 1.06 [1.04; 1.08]                 |
| gender                                 | female         | 0.79 [0.62; 1.02]        | 0.56 [0.36; 0.84]    | 0.60 [0.48; 0.76]                  | 0.89 [0.70; 1.14]                 |
| Heart Failure                          | unknown        | 1.33 [0.86; 2.06]        | 0.79 [0.36; 1.72]    | 1.10 [0.74; 1.63]                  | 1.87 [1.24; 2.80]                 |
|                                        | yes            | 1.93 [1.52; 2.44]        | 1.50 [1.06; 2.11]    | 1.31 [1.06; 1.62]                  | 2.17 [1.72; 2.74]                 |
| BMI (kg/m <sup>2</sup> )               |                | 1.00 [0.98; 1.02]        | 1.00 [0.98; 1.03]    | 1.00 [0.98; 1.02]                  | 1.03 [1.02; 1.05]                 |
| Systolic BP (mmHg)                     |                | 1.00 [1.00; 1.01]        | 1.00 [1.00; 1.01]    | 1.00 [1.00; 1.01]                  | 1.00 [1.00; 1.01]                 |
| LDL cholesterol (mg/dl)                |                | 1.00 [1.00; 1.00]        | 1.00 [1.00; 1.00]    | 1.00 [1.00; 1.00]                  | 1.00 [1.00; 1.00]                 |
| Diabetes                               | yes            | 1.78 [1.42; 2.23]        | 2.44 [1.70; 3.49]    | 1.71 [1.40; 2.08]                  | 1.72 [1.36; 2.18]                 |
| eGFR (ml/min per 1.73 m <sup>2</sup> ) |                | 0.99 [0.98; 1.00]        | 0.98 [0.96; 0.99]    | 0.99 [0.98; 0.99]                  | 0.99 [0.98; 1.00]                 |
| UACR (mg/g)                            |                | 1.00 [1.00; 1.00]        | 1.00 [1.00; 1.00]    | 1.00 [1.00; 1.00]                  | 1.00 [1.00; 1.00]                 |
| Previous CVD                           | yes            | 1.23 [0.96; 1.56]        | 2.03 [1.42; 2.90]    | 1.73 [1.40; 2.14]                  | 1.62 [1.28; 2.05]                 |
| Smoking history                        | current smoker | 2.71 [1.98; 3.70]        | 1.27 [0.76; 2.11]    | 1.39 [1.06; 1.84]                  | 1.77 [1.28; 2.45]                 |
|                                        | former smoker  | 1.34 [1.04; 1.72]        | 0.95 [0.66; 1.35]    | 0.97 [0.78; 1.19]                  | 1.01 [0.78; 1.30]                 |
| hsCRP (mg/dl)                          |                | 1.02 [1.00; 1.02]        | 1.02 [1.00; 1.03]    | 1.01 [1.00; 1.02]                  | 1.01 [1.00; 1.02]                 |
| Statins                                | yes            | 0.70 [0.56; 0.89]        | 0.74 [0.52; 1.06]    | 0.93 [0.76; 1.14]                  | 0.88 [0.70; 1.13]                 |
| RASi                                   | yes            | 0.76 [0.58; 1.02]        | 1.40 [0.80; 2.45]    | 1.14 [0.84; 1.53]                  | 1.27 [0.88; 1.82]                 |
| Anti-platelet agents                   | yes            | 0.83 [0.66; 1.05]        | 1.08 [0.76; 1.53]    | 1.39 [1.12; 1.71]                  | 0.84 [0.66; 1.06]                 |
| Beta-blockers                          | yes            | 1.18 [0.92; 1.49]        | 1.40 [0.94; 2.08]    | 1.25 [1.02; 1.55]                  | 1.72 [1.32; 2.26]                 |
| MRA                                    | yes            | 1.08 [0.78; 1.50]        | 2.23 [1.50; 3.31]    | 1.14 [0.84; 1.53]                  | 1.73 [1.30; 2.30]                 |
| regional center                        | AA             | 1.02 [0.68; 1.54]        | 0.58 [0.30; 1.16]    | 0.60 [0.40; 0.91]                  | 0.59 [0.38; 0.93]                 |
|                                        | BE             | 1.07 [0.72; 1.59]        | 0.64 [0.34; 1.17]    | 1.03 [0.74; 1.44]                  | 0.68 [0.46; 1.01]                 |
|                                        | FR             | 1.06 [0.66; 1.67]        | 1.14 [0.62; 2.13]    | 0.79 [0.52; 1.20]                  | 0.67 [0.40; 1.10]                 |
|                                        | HA             | 0.97 [0.60; 1.56]        | 0.59 [0.28; 1.27]    | 0.79 [0.52; 1.22]                  | 0.52 [0.30; 0.88]                 |
|                                        | HE             | 1.49 [1.00; 2.21]        | 0.29 [0.10; 0.82]    | 0.62 [0.40; 0.96]                  | 0.47 [0.26; 0.81]                 |
|                                        | JE             | 0.89 [0.62; 1.30]        | 0.80 [0.48; 1.35]    | 0.90 [0.66; 1.23]                  | 0.79 [0.56; 1.11]                 |
|                                        | MU             | 0.78 [0.50; 1.23]        | 0.98 [0.54; 1.76]    | 0.91 [0.64; 1.31]                  | 0.87 [0.58; 1.31]                 |
|                                        | WU             | 0.93 [0.66; 1.30]        | 0.95 [0.60; 1.48]    | 1.14 [0.88; 1.49]                  | 0.77 [0.56; 1.06]                 |
| Copeptin (pmol/l)                      | Q2             | 1.02 [0.64; 1.64]        | 1.31 [0.56; 3.02]    | 1.05 [0.74; 1.51]                  | 1.06 [0.66; 1.72]                 |

|                                        |                |                   |                   |                   |                   |
|----------------------------------------|----------------|-------------------|-------------------|-------------------|-------------------|
|                                        | Q3             | 1.58 [1.02; 2.44] | 1.31 [0.58; 2.98] | 0.90 [0.62; 1.29] | 1.47 [0.94; 2.32] |
|                                        | Q4             | 1.53 [0.98; 2.37] | 1.94 [0.88; 4.30] | 1.28 [0.90; 1.83] | 1.56 [0.98; 2.46] |
|                                        | Q5             | 2.01 [1.30; 3.14] | 2.91 [1.32; 6.44] | 1.39 [0.96; 2.01] | 2.36 [1.50; 3.74] |
| Age (ys)                               |                | 1.06 [1.04; 1.08] | 1.05 [1.02; 1.08] | 1.03 [1.02; 1.04] | 1.06 [1.04; 1.08] |
| gender                                 | female         | 0.82 [0.64; 1.06] | 0.59 [0.38; 0.90] | 0.62 [0.48; 0.78] | 0.91 [0.70; 1.17] |
| Heart Failure                          | unknown        | 1.35 [0.88; 2.09] | 0.78 [0.36; 1.70] | 1.09 [0.74; 1.61] | 1.90 [1.26; 2.85] |
|                                        | yes            | 1.93 [1.52; 2.44] | 1.48 [1.06; 2.09] | 1.31 [1.06; 1.61] | 2.18 [1.72; 2.75] |
| BMI (kg/m <sup>2</sup> )               |                | 1.00 [0.98; 1.02] | 1.00 [0.98; 1.03] | 1.00 [0.98; 1.02] | 1.03 [1.02; 1.05] |
| Systolic BP (mmHg)                     |                | 1.00 [1.00; 1.01] | 1.00 [1.00; 1.01] | 1.00 [1.00; 1.01] | 1.00 [1.00; 1.01] |
| LDL cholesterol (mg/dl)                |                | 1.00 [1.00; 1.00] | 1.00 [1.00; 1.00] | 1.00 [1.00; 1.00] | 1.00 [1.00; 1.00] |
| Diabetes                               | yes            | 1.73 [1.38; 2.17] | 2.30 [1.60; 3.31] | 1.68 [1.38; 2.05] | 1.66 [1.32; 2.11] |
| eGFR (ml/min per 1.73 m <sup>2</sup> ) |                | 0.99 [0.98; 1.00] | 0.98 [0.96; 0.99] | 0.99 [0.98; 0.99] | 0.99 [0.98; 1.00] |
| UACR (mg/g)                            |                | 1.00 [1.00; 1.00] | 1.00 [1.00; 1.00] | 1.00 [1.00; 1.00] | 1.00 [1.00; 1.00] |
| Previous CVD                           | yes            | 1.21 [0.96; 1.54] | 1.99 [1.40; 2.84] | 1.73 [1.40; 2.14] | 1.58 [1.24; 2.01] |
| Smoking history                        | current smoker | 2.63 [1.92; 3.59] | 1.24 [0.74; 2.05] | 1.38 [1.04; 1.83] | 1.72 [1.24; 2.38] |
|                                        | former smoker  | 1.34 [1.04; 1.73] | 0.96 [0.68; 1.37] | 0.97 [0.78; 1.19] | 1.01 [0.80; 1.30] |
| hsCRP (mg/dl)                          |                | 1.02 [1.00; 1.02] | 1.02 [1.00; 1.03] | 1.01 [1.00; 1.02] | 1.01 [1.00; 1.02] |
| Statins                                | yes            | 0.71 [0.56; 0.90] | 0.75 [0.52; 1.07] | 0.92 [0.74; 1.13] | 0.90 [0.70; 1.15] |
| RASi                                   | yes            | 0.75 [0.56; 1.00] | 1.38 [0.80; 2.42] | 1.14 [0.84; 1.54] | 1.24 [0.86; 1.78] |
| Anti-platelet agents                   | yes            | 0.84 [0.66; 1.06] | 1.12 [0.80; 1.58] | 1.41 [1.14; 1.75] | 0.85 [0.68; 1.07] |
| Beta-blockers                          | yes            | 1.16 [0.92; 1.47] | 1.37 [0.92; 2.03] | 1.24 [1.00; 1.54] | 1.69 [1.30; 2.22] |
| MRA                                    | yes            | 1.07 [0.78; 1.49] | 2.14 [1.44; 3.18] | 1.12 [0.84; 1.51] | 1.70 [1.28; 2.26] |
| regional center                        | AA             | 1.01 [0.66; 1.52] | 0.57 [0.30; 1.14] | 0.59 [0.38; 0.89] | 0.59 [0.38; 0.92] |
|                                        | BE             | 1.06 [0.72; 1.56] | 0.63 [0.34; 1.15] | 1.02 [0.72; 1.42] | 0.68 [0.46; 1.00] |
|                                        | FR             | 1.03 [0.64; 1.63] | 1.08 [0.58; 2.01] | 0.78 [0.52; 1.19] | 0.63 [0.38; 1.04] |
|                                        | HA             | 0.95 [0.58; 1.53] | 0.57 [0.26; 1.24] | 0.78 [0.50; 1.21] | 0.51 [0.30; 0.86] |
|                                        | HE             | 1.46 [0.98; 2.16] | 0.27 [0.10; 0.77] | 0.60 [0.38; 0.94] | 0.45 [0.26; 0.78] |
|                                        | JE             | 0.88 [0.60; 1.27] | 0.77 [0.46; 1.30] | 0.89 [0.64; 1.22] | 0.77 [0.54; 1.09] |
|                                        | MU             | 0.78 [0.50; 1.24] | 0.95 [0.52; 1.72] | 0.90 [0.62; 1.30] | 0.87 [0.58; 1.30] |
|                                        | WU             | 0.94 [0.68; 1.31] | 0.94 [0.60; 1.47] | 1.13 [0.86; 1.48] | 0.77 [0.56; 1.06] |

**Results are presented as hazard ratios with 95%-confidence intervals given in parentheses**

<sup>a</sup> model A: all models adjusted for age, gender,

<sup>b</sup> model B: all models adjusted for age, gender, BMI, systolic BP, LDL cholesterol, diabetes, eGFR, UACR, smoking, hs-CRP, preexisting CVD, history of heart failure, CV medication, i.e. use of statins, RASi, anti-platelet agents, beta-blockers, and mineralocorticoid receptor antagonists and regional center.

<sup>c</sup> SD Copeptin 11.7 pmol/l (whole population),

<sup>d</sup> SD for MR-proANP 109.04 pmol/l (whole population),

<sup>e</sup> SD for NT-proBNP 1073.4 pg/ml (whole population)



**Table S4 Models A and Models B for MR-proANP (showing all included variables)**

|                                        |                | Non-cardiovascular death | Cardiovascular death | Major adverse cardiovascular event | Hospitalization for Heart Failure |
|----------------------------------------|----------------|--------------------------|----------------------|------------------------------------|-----------------------------------|
|                                        |                | HR (95% CI)              | HR (95% CI)          | HR (95% CI)                        | HR (95% CI)                       |
| <b>Adjusted model A<sup>a</sup></b>    |                |                          |                      |                                    |                                   |
| MR-proANP HR per SD increase           |                | 1.51 [1.42; 1.60]        | 1.68 [1.56; 1.82]    | 1.40 [1.32; 1.49]                  | 1.68 [1.58; 1.79]                 |
| Age (ys)                               |                | 1.06 [1.04; 1.07]        | 1.06 [1.04; 1.08]    | 1.04 [1.04; 1.05]                  | 1.06 [1.04; 1.07]                 |
| gender                                 | female         | 0.65 [0.52; 0.81]        | 0.45 [0.32; 0.65]    | 0.51 [0.42; 0.62]                  | 0.75 [0.60; 0.93]                 |
| MR-proANP (pmol/l)                     | Q2             | 0.98 [0.62; 1.58]        | 1.17 [0.52; 2.65]    | 0.91 [0.62; 1.31]                  | 1.08 [0.60; 1.93]                 |
|                                        | Q3             | 1.45 [0.94; 2.23]        | 1.62 [0.76; 3.44]    | 1.44 [1.04; 2.02]                  | 2.25 [1.36; 3.76]                 |
|                                        | Q4             | 1.91 [1.26; 2.89]        | 1.92 [0.92; 3.99]    | 1.51 [1.08; 2.11]                  | 3.11 [1.90; 5.09]                 |
|                                        | Q5             | 4.20 [2.84; 6.20]        | 7.30 [3.74; 14.24]   | 2.83 [2.08; 3.88]                  | 7.77 [4.84; 12.48]                |
| Age (ys)                               |                | 1.05 [1.04; 1.06]        | 1.05 [1.04; 1.08]    | 1.04 [1.02; 1.05]                  | 1.05 [1.04; 1.06]                 |
| gender                                 | female         | 0.63 [0.52; 0.78]        | 0.43 [0.30; 0.61]    | 0.50 [0.40; 0.61]                  | 0.71 [0.58; 0.88]                 |
| <b>Adjusted model B<sup>b</sup></b>    |                |                          |                      |                                    |                                   |
| MR-proANP HR per SD increase           |                | 1.41 [1.30; 1.52]        | 1.54 [1.38; 1.71]    | 1.25 [1.16; 1.36]                  | 1.58 [1.46; 1.71]                 |
| Age (ys)                               |                | 1.06 [1.04; 1.07]        | 1.05 [1.02; 1.07]    | 1.03 [1.02; 1.04]                  | 1.05 [1.04; 1.07]                 |
| gender                                 | female         | 0.75 [0.58; 0.95]        | 0.52 [0.34; 0.79]    | 0.59 [0.46; 0.73]                  | 0.83 [0.64; 1.06]                 |
| Heart Failure                          | unknown        | 1.24 [0.80; 1.92]        | 0.81 [0.38; 1.76]    | 1.11 [0.76; 1.65]                  | 1.87 [1.24; 2.8]                  |
|                                        | yes            | 1.77 [1.40; 2.24]        | 1.45 [1.04; 2.03]    | 1.27 [1.02; 1.57]                  | 2.04 [1.62; 2.57]                 |
| BMI (kg/m <sup>2</sup> )               |                | 1.01 [1.00; 1.03]        | 1.02 [0.98; 1.05]    | 1.00 [0.98; 1.02]                  | 1.05 [1.02; 1.06]                 |
| Systolic BP (mmHg)                     |                | 1.00 [1.00; 1.01]        | 1.00 [1.00; 1.01]    | 1.00 [1.00; 1.01]                  | 1.00 [1.00; 1.00]                 |
| LDL cholesterol (mg/dl)                |                | 1.00 [1.00; 1.00]        | 1.00 [1.00; 1.00]    | 1.00 [1.00; 1.00]                  | 1.00 [1.00; 1.00]                 |
| Diabetes                               | yes            | 1.91 [1.52; 2.40]        | 2.71 [1.90; 3.87]    | 1.75 [1.44; 2.14]                  | 1.96 [1.56; 2.47]                 |
| eGFR (ml/min per 1.73 m <sup>2</sup> ) |                | 0.99 [0.98; 1.00]        | 0.98 [0.98; 1.00]    | 0.99 [0.98; 1.00]                  | 1.00 [0.98; 1.01]                 |
| UACR (mg/g)                            |                | 1.00 [1.00; 1.00]        | 1.00 [1.00; 1.00]    | 1.00 [1.00; 1.00]                  | 1.00 [1.00; 1.00]                 |
| Previous CVD                           | yes            | 1.11 [0.88; 1.42]        | 1.78 [1.24; 2.55]    | 1.64 [1.32; 2.03]                  | 1.44 [1.12; 1.83]                 |
| Smoking history                        | current smoker | 2.85 [2.08; 3.89]        | 1.38 [0.82; 2.30]    | 1.43 [1.08; 1.89]                  | 1.92 [1.38; 2.67]                 |
|                                        | former smoker  | 1.33 [1.04; 1.71]        | 0.92 [0.64; 1.31]    | 0.95 [0.78; 1.18]                  | 0.98 [0.76; 1.25]                 |
| hsCRP (mg/dl)                          |                | 1.01 [1.00; 1.02]        | 1.01 [1.00; 1.03]    | 1.01 [1.00; 1.02]                  | 1.01 [1.00; 1.02]                 |
| Statins                                | yes            | 0.70 [0.56; 0.89]        | 0.72 [0.50; 1.03]    | 0.92 [0.74; 1.13]                  | 0.88 [0.68; 1.12]                 |
| RASi                                   | yes            | 0.76 [0.58; 1.01]        | 1.43 [0.82; 2.49]    | 1.15 [0.86; 1.54]                  | 1.30 [0.90; 1.87]                 |
| Anti-platelet agents                   | yes            | 0.93 [0.74; 1.17]        | 1.21 [0.86; 1.71]    | 1.45 [1.18; 1.78]                  | 0.94 [0.74; 1.19]                 |
| Beta-blockers                          | yes            | 0.98 [0.76; 1.25]        | 1.09 [0.74; 1.63]    | 1.12 [0.90; 1.39]                  | 1.35 [1.02; 1.77]                 |
| MRA                                    | yes            | 1.04 [0.76; 1.45]        | 2.10 [1.42; 3.11]    | 1.11 [0.82; 1.49]                  | 1.68 [1.26; 2.23]                 |
| regional center                        | AA             | 1.07 [0.70; 1.63]        | 0.68 [0.34; 1.35]    | 0.63 [0.40; 0.96]                  | 0.67 [0.42; 1.06]                 |
|                                        | BE             | 1.20 [0.82; 1.78]        | 0.81 [0.44; 1.49]    | 1.13 [0.80; 1.58]                  | 0.83 [0.56; 1.23]                 |
|                                        | FR             | 1.18 [0.74; 1.87]        | 1.42 [0.76; 2.67]    | 0.86 [0.56; 1.30]                  | 0.80 [0.48; 1.33]                 |
|                                        | HA             | 1.04 [0.64; 1.68]        | 0.66 [0.30; 1.42]    | 0.85 [0.54; 1.30]                  | 0.61 [0.36; 1.03]                 |
|                                        | HE             | 1.54 [1.04; 2.28]        | 0.30 [0.10; 0.84]    | 0.64 [0.40; 0.99]                  | 0.52 [0.30; 0.90]                 |
|                                        | JE             | 0.97 [0.66; 1.40]        | 0.94 [0.56; 1.60]    | 0.96 [0.70; 1.32]                  | 0.93 [0.66; 1.32]                 |
|                                        | MU             | 0.83 [0.52; 1.31]        | 1.18 [0.64; 2.15]    | 0.96 [0.66; 1.39]                  | 0.97 [0.64; 1.47]                 |
|                                        | WU             | 0.99 [0.70; 1.39]        | 1.05 [0.66; 1.65]    | 1.21 [0.92; 1.58]                  | 0.88 [0.64; 1.20]                 |

|                                        |                |                   |                   |                   |                    |
|----------------------------------------|----------------|-------------------|-------------------|-------------------|--------------------|
| MR-proANP (pmol/l)                     | Q2             | 0.87 [0.54; 1.42] | 1.14 [0.50; 2.57] | 0.80 [0.54; 1.17] | 1.23 [0.68; 2.25]  |
|                                        | Q3             | 1.14 [0.72; 1.80] | 1.26 [0.60; 2.71] | 1.15 [0.80; 1.63] | 2.08 [1.20; 3.60]  |
|                                        | Q4             | 1.47 [0.94; 2.28] | 1.13 [0.52; 2.42] | 1.00 [0.70; 1.43] | 2.74 [1.60; 4.69]  |
|                                        | Q5             | 2.72 [1.76; 4.20] | 3.70 [1.82; 7.51] | 1.66 [1.16; 2.36] | 6.03 [3.54; 10.28] |
|                                        | Age (ys)       | 1.05 [1.04; 1.07] | 1.04 [1.02; 1.07] | 1.03 [1.02; 1.04] | 1.05 [1.04; 1.07]  |
| gender                                 | female         | 0.74 [0.58; 0.95] | 0.51 [0.34; 0.76] | 0.58 [0.46; 0.73] | 0.81 [0.64; 1.04]  |
| Heart Failure                          | unknown        | 1.27 [0.82; 1.97] | 0.79 [0.36; 1.72] | 1.11 [0.76; 1.65] | 1.76 [1.18; 2.64]  |
|                                        | yes            | 1.80 [1.42; 2.28] | 1.49 [1.06; 2.10] | 1.29 [1.04; 1.59] | 2.05 [1.62; 2.58]  |
| BMI (kg/m <sup>2</sup> )               |                | 1.01 [0.98; 1.03] | 1.01 [0.98; 1.03] | 1.00 [0.98; 1.02] | 1.04 [1.02; 1.06]  |
| Systolic BP (mmHg)                     |                | 1.00 [1.00; 1.01] | 1.00 [1.00; 1.01] | 1.00 [1.00; 1.01] | 1.00 [1.00; 1.00]  |
| LDL cholesterol (mg/dl)                |                | 1.00 [1.00; 1.00] | 1.00 [1.00; 1.00] | 1.00 [1.00; 1.00] | 1.00 [1.00; 1.00]  |
| Diabetes                               | yes            | 1.86 [1.48; 2.33] | 2.58 [1.80; 3.69] | 1.74 [1.42; 2.12] | 1.86 [1.48; 2.35]  |
| eGFR (ml/min per 1.73 m <sup>2</sup> ) |                | 0.99 [0.98; 1.00] | 0.98 [0.96; 0.99] | 0.99 [0.98; 1.00] | 1.00 [1.00; 1.01]  |
| UACR (mg/g)                            |                | 1.00 [1.00; 1.00] | 1.00 [1.00; 1.00] | 1.00 [1.00; 1.00] | 1.00 [1.00; 1.00]  |
| Previous CVD                           | yes            | 1.11 [0.88; 1.42] | 1.82 [1.26; 2.60] | 1.65 [1.34; 2.05] | 1.40 [1.10; 1.78]  |
| Smoking history                        | current smoker | 2.85 [2.08; 3.90] | 1.29 [0.78; 2.16] | 1.42 [1.08; 1.88] | 1.96 [1.40; 2.72]  |
|                                        | former smoker  | 1.31 [1.02; 1.69] | 0.89 [0.62; 1.28] | 0.96 [0.78; 1.18] | 1.01 [0.78; 1.29]  |
|                                        | smoker         | 1.01 [1.00; 1.02] | 1.02 [1.00; 1.03] | 1.01 [1.00; 1.02] | 1.01 [1.00; 1.02]  |
| hsCRP (mg/dl)                          |                | 1.01 [1.00; 1.02] | 1.02 [1.00; 1.03] | 1.01 [1.00; 1.02] | 1.01 [1.00; 1.02]  |
| Statins                                | yes            | 0.71 [0.56; 0.90] | 0.74 [0.52; 1.06] | 0.92 [0.74; 1.13] | 0.89 [0.70; 1.13]  |
| RASi                                   | yes            | 0.79 [0.60; 1.06] | 1.50 [0.86; 2.62] | 1.16 [0.86; 1.56] | 1.36 [0.96; 1.95]  |
| Anti-platelet agents                   | yes            | 0.90 [0.72; 1.13] | 1.24 [0.88; 1.75] | 1.45 [1.18; 1.79] | 0.96 [0.76; 1.21]  |
| Beta-blockers                          | yes            | 0.96 [0.74; 1.23] | 1.09 [0.72; 1.64] | 1.13 [0.90; 1.42] | 1.22 [0.92; 1.61]  |
| MRA                                    | yes            | 1.05 [0.76; 1.46] | 2.24 [1.50; 3.32] | 1.12 [0.84; 1.51] | 1.62 [1.22; 2.16]  |
| regional center                        | AA             | 1.04 [0.68; 1.59] | 0.60 [0.30; 1.18] | 0.60 [0.40; 0.92] | 0.60 [0.38; 0.94]  |
|                                        | BE             | 1.09 [0.74; 1.61] | 0.65 [0.36; 1.19] | 1.06 [0.76; 1.48] | 0.71 [0.48; 1.05]  |
|                                        | FR             | 1.06 [0.68; 1.68] | 1.16 [0.62; 2.17] | 0.80 [0.52; 1.22] | 0.66 [0.40; 1.10]  |
|                                        | HA             | 1.00 [0.62; 1.61] | 0.63 [0.30; 1.37] | 0.81 [0.52; 1.25] | 0.53 [0.32; 0.90]  |
|                                        | HE             | 1.43 [0.96; 2.13] | 0.27 [0.10; 0.77] | 0.60 [0.38; 0.94] | 0.44 [0.26; 0.77]  |
|                                        | JE             | 0.92 [0.64; 1.34] | 0.84 [0.50; 1.41] | 0.92 [0.66; 1.26] | 0.86 [0.60; 1.21]  |
|                                        | MU             | 0.82 [0.52; 1.30] | 1.15 [0.64; 2.08] | 0.93 [0.64; 1.35] | 0.92 [0.62; 1.39]  |
|                                        | WU             | 0.92 [0.66; 1.28] | 0.92 [0.58; 1.44] | 1.15 [0.88; 1.51] | 0.77 [0.56; 1.06]  |

**Results are presented as hazard ratios with 95%-confidence intervals given in parentheses**

<sup>a</sup> model A: all models adjusted for age, gender,

<sup>b</sup> model B: all models adjusted for age, gender, BMI, systolic BP, LDL cholesterol, diabetes, eGFR, UACR, smoking, hs-CRP, preexisting CVD, history of heart failure, CV medication, i.e. use of statins, RASi, anti-platelet agents, beta-blockers, and mineralocorticoid receptor antagonists and regional center.

<sup>c</sup> SD Copeptin 11.7 pmol/l (whole population),

<sup>d</sup> SD for MR-proANP 109.04 pmol/l (whole population),

<sup>e</sup> SD for NT-proBNP 1073.4 pg/ml (whole population)

**Table S5 Models A and Models B for NT-proBNP (showing all included variables)**

|                                        |                | Non-cardiovascular death | Cardiovascular death | Major adverse cardiovascular event | Hospitalization for Heart Failure |
|----------------------------------------|----------------|--------------------------|----------------------|------------------------------------|-----------------------------------|
|                                        |                | HR (95% CI)              | HR (95% CI)          | HR (95% CI)                        | HR (95% CI)                       |
| <b>Adjusted model A<sup>a</sup></b>    |                |                          |                      |                                    |                                   |
| NT-proBNP HR per SD increase           |                | 1.20 [1.16; 1.24]        | 1.28 [1.24; 1.32]    | 1.23 [1.20; 1.27]                  | 1.38 [1.32; 1.42]                 |
| Age (ys)                               |                | 1.07 [1.06; 1.08]        | 1.08 [1.06; 1.10]    | 1.05 [1.04; 1.06]                  | 1.07 [1.06; 1.09]                 |
| gender                                 | female         | 0.60 [0.48; 0.75]        | 0.38 [0.26; 0.54]    | 0.49 [0.40; 0.60]                  | 0.69 [0.56; 0.86]                 |
| NT-proBNP (pg/ml)                      | Q2             | 1.67 [1.00; 2.80]        | 1.19 [0.50; 2.85]    | 1.27 [0.86; 1.87]                  | 2.40 [1.16; 4.97]                 |
|                                        | Q3             | 2.06 [1.24; 3.39]        | 0.94 [0.38; 2.34]    | 1.45 [1.00; 2.11]                  | 3.30 [1.64; 6.63]                 |
|                                        | Q4             | 3.35 [2.10; 5.38]        | 2.56 [1.20; 5.48]    | 2.45 [1.72; 3.47]                  | 7.66 [3.96; 14.81]                |
|                                        | Q5             | 7.59 [4.82; 11.96]       | 11.26 [5.60; 22.69]  | 4.56 [3.26; 6.36]                  | 21.96 [11.52; 41.82]              |
| Age (ys)                               |                | 1.05 [1.04; 1.06]        | 1.05 [1.02; 1.07]    | 1.03 [1.02; 1.05]                  | 1.04 [1.02; 1.06]                 |
| gender                                 | female         | 0.60 [0.48; 0.75]        | 0.42 [0.30; 0.60]    | 0.48 [0.40; 0.58]                  | 0.66 [0.54; 0.82]                 |
| <b>Adjusted model B<sup>b</sup></b>    |                |                          |                      |                                    |                                   |
| NT-proBNP HR per SD increase           |                | 1.14 [1.08; 1.19]        | 1.25 [1.18; 1.32]    | 1.17 [1.12; 1.23]                  | 1.32 [1.26; 1.37]                 |
| Age (ys)                               |                | 1.06 [1.04; 1.08]        | 1.05 [1.02; 1.08]    | 1.03 [1.02; 1.04]                  | 1.06 [1.04; 1.08]                 |
| gender                                 | female         | 0.72 [0.56; 0.92]        | 0.47 [0.30; 0.70]    | 0.57 [0.46; 0.72]                  | 0.77 [0.60; 0.99]                 |
| Heart Failure                          | unknown        | 1.24 [0.80; 1.94]        | 0.71 [0.32; 1.58]    | 1.11 [0.76; 1.64]                  | 1.87 [1.24; 2.80]                 |
|                                        | yes            | 1.90 [1.50; 2.41]        | 1.46 [1.04; 2.04]    | 1.26 [1.02; 1.56]                  | 2.11 [1.68; 2.66]                 |
| BMI (kg/m <sup>2</sup> )               |                | 1.01 [0.98; 1.03]        | 1.02 [0.98; 1.05]    | 1.01 [0.98; 1.02]                  | 1.05 [1.02; 1.07]                 |
| Systolic BP (mmHg)                     |                | 1.00 [1.00; 1.01]        | 1.00 [1.00; 1.01]    | 1.00 [1.00; 1.01]                  | 1.00 [1.00; 1.00]                 |
| LDL cholesterol (mg/dl)                |                | 1.00 [1.00; 1.00]        | 1.00 [1.00; 1.00]    | 1.00 [1.00; 1.00]                  | 1.00 [1.00; 1.00]                 |
| Diabetes                               | yes            | 1.85 [1.48; 2.32]        | 2.55 [1.78; 3.65]    | 1.69 [1.38; 2.06]                  | 1.76 [1.40; 2.22]                 |
| eGFR (ml/min per 1.73 m <sup>2</sup> ) |                | 0.98 [0.98; 0.99]        | 0.98 [0.96; 0.99]    | 0.99 [0.98; 0.99]                  | 0.99 [0.98; 1.00]                 |
| UACR (mg/g)                            |                | 1.00 [1.00; 1.00]        | 1.00 [1.00; 1.00]    | 1.00 [1.00; 1.00]                  | 1.00 [1.00; 1.00]                 |
| Previous CVD                           | yes            | 1.19 [0.94; 1.51]        | 1.87 [1.30; 2.68]    | 1.65 [1.34; 2.04]                  | 1.49 [1.16; 1.89]                 |
| Smoking history                        | current smoker | 2.63 [1.92; 3.6]         | 1.18 [0.70; 1.97]    | 1.36 [1.02; 1.80]                  | 1.71 [1.22; 2.38]                 |
|                                        | former smoker  | 1.31 [1.02; 1.69]        | 0.88 [0.62; 1.26]    | 0.94 [0.76; 1.16]                  | 0.99 [0.76; 1.27]                 |
| hsCRP (mg/dl)                          |                | 1.01 [1.00; 1.02]        | 1.01 [1.00; 1.02]    | 1.01 [1.00; 1.02]                  | 1.01 [1.00; 1.02]                 |
| Statins                                | yes            | 0.72 [0.58; 0.92]        | 0.78 [0.54; 1.12]    | 0.94 [0.76; 1.17]                  | 0.92 [0.72; 1.18]                 |
| RASi                                   | yes            | 0.76 [0.56; 1.01]        | 1.45 [0.82; 2.54]    | 1.14 [0.84; 1.53]                  | 1.28 [0.90; 1.84]                 |
| Anti-platelet agents                   | yes            | 0.85 [0.68; 1.07]        | 1.14 [0.80; 1.61]    | 1.43 [1.16; 1.76]                  | 0.92 [0.72; 1.17]                 |
| Beta-blockers                          | yes            | 1.12 [0.88; 1.42]        | 1.24 [0.84; 1.84]    | 1.19 [0.96; 1.47]                  | 1.55 [1.18; 2.03]                 |
| MRA                                    | yes            | 1.07 [0.78; 1.49]        | 2.11 [1.42; 3.12]    | 1.09 [0.82; 1.47]                  | 1.59 [1.20; 2.12]                 |
| regional center                        | AA             | 1.02 [0.68; 1.55]        | 0.65 [0.32; 1.29]    | 0.64 [0.42; 0.99]                  | 0.64 [0.40; 1.01]                 |
|                                        | BE             | 1.16 [0.78; 1.71]        | 0.81 [0.44; 1.50]    | 1.17 [0.84; 1.64]                  | 0.82 [0.56; 1.21]                 |
|                                        | FR             | 1.10 [0.70; 1.74]        | 1.36 [0.72; 2.56]    | 0.87 [0.56; 1.32]                  | 0.74 [0.44; 1.23]                 |
|                                        | HA             | 1.05 [0.64; 1.69]        | 0.73 [0.34; 1.60]    | 0.88 [0.58; 1.36]                  | 0.62 [0.36; 1.05]                 |
|                                        | HE             | 1.61 [1.08; 2.39]        | 0.36 [0.12; 1.01]    | 0.68 [0.44; 1.06]                  | 0.55 [0.32; 0.96]                 |
|                                        | JE             | 0.94 [0.64; 1.37]        | 0.95 [0.56; 1.62]    | 0.98 [0.72; 1.35]                  | 0.89 [0.64; 1.26]                 |
|                                        | MU             | 0.83 [0.52; 1.31]        | 1.18 [0.64; 2.14]    | 0.99 [0.68; 1.43]                  | 0.96 [0.64; 1.45]                 |
|                                        | WU             | 0.97 [0.70; 1.35]        | 1.06 [0.68; 1.66]    | 1.23 [0.94; 1.61]                  | 0.81 [0.60; 1.11]                 |

|                                        |                |                   |                    |                   |                     |
|----------------------------------------|----------------|-------------------|--------------------|-------------------|---------------------|
| NT-proBNP (pg/ml)                      | Q2             | 1.80 [1.02; 3.16] | 0.98 [0.40; 2.35]  | 1.08 [0.72; 1.60] | 1.87 [0.90; 3.94]   |
|                                        | Q3             | 2.11 [1.22; 3.66] | 0.66 [0.26; 1.67]  | 1.09 [0.74; 1.61] | 2.58 [1.26; 5.26]   |
|                                        | Q4             | 2.99 [1.76; 5.07] | 1.44 [0.66; 3.18]  | 1.61 [1.10; 2.33] | 5.21 [2.64; 10.25]  |
|                                        | Q5             | 5.73 [3.38; 9.68] | 4.99 [2.36; 10.53] | 2.56 [1.76; 3.72] | 12.72 [6.50; 24.88] |
|                                        | Age (ys)       | 1.05 [1.04; 1.07] | 1.04 [1.02; 1.07]  | 1.02 [1.02; 1.04] | 1.04 [1.02; 1.06]   |
| gender                                 | female         | 0.68 [0.54; 0.87] | 0.48 [0.32; 0.72]  | 0.56 [0.44; 0.70] | 0.72 [0.56; 0.92]   |
| Heart Failure                          | unknown        | 1.22 [0.80; 1.90] | 0.75 [0.34; 1.64]  | 1.06 [0.72; 1.56] | 1.69 [1.12; 2.53]   |
|                                        | yes            | 1.66 [1.32; 2.10] | 1.32 [0.94; 1.86]  | 1.20 [0.98; 1.49] | 1.85 [1.46; 2.33]   |
| BMI (kg/m <sup>2</sup> )               |                | 1.01 [1.00; 1.03] | 1.01 [0.98; 1.04]  | 1.00 [0.98; 1.02] | 1.04 [1.02; 1.06]   |
| Systolic BP (mmHg)                     |                | 1.00 [1.00; 1.00] | 1.00 [1.00; 1.01]  | 1.00 [1.00; 1.01] | 1.00 [1.00; 1.00]   |
| LDL cholesterol (mg/dl)                |                | 1.00 [1.00; 1.00] | 1.00 [1.00; 1.00]  | 1.00 [1.00; 1.00] | 1.00 [1.00; 1.00]   |
| Diabetes                               | yes            | 1.79 [1.42; 2.24] | 2.43 [1.70; 3.47]  | 1.72 [1.40; 2.09] | 1.79 [1.42; 2.25]   |
| eGFR (ml/min per 1.73 m <sup>2</sup> ) |                | 0.99 [0.98; 1.00] | 0.98 [0.96; 0.99]  | 0.99 [0.98; 1.00] | 1.00 [0.98; 1.00]   |
| UACR (mg/g)                            |                | 1.00 [1.00; 1.00] | 1.00 [1.00; 1.00]  | 1.00 [1.00; 1.00] | 1.00 [1.00; 1.00]   |
| Previous CVD                           | yes            | 1.02 [0.80; 1.31] | 1.58 [1.10; 2.27]  | 1.53 [1.24; 1.90] | 1.23 [0.96; 1.57]   |
| Smoking history                        | current smoker | 2.55 [1.86; 3.49] | 1.16 [0.70; 1.93]  | 1.33 [1.00; 1.75] | 1.63 [1.18; 2.26]   |
|                                        | former smoker  | 1.28 [1.00; 1.65] | 0.88 [0.62; 1.26]  | 0.94 [0.76; 1.17] | 0.96 [0.74; 1.24]   |
|                                        |                | 1.01 [1.00; 1.02] | 1.01 [1.00; 1.03]  | 1.01 [1.00; 1.02] | 1.01 [1.00; 1.02]   |
| hsCRP (mg/dl)                          |                | 0.71 [0.56; 0.90] | 0.75 [0.52; 1.08]  | 0.92 [0.74; 1.13] | 0.86 [0.68; 1.10]   |
| Statins                                | yes            | 0.79 [0.60; 1.05] | 1.53 [0.88; 2.67]  | 1.17 [0.88; 1.58] | 1.43 [1.00; 2.05]   |
| RASi                                   | yes            | 0.91 [0.72; 1.15] | 1.33 [0.94; 1.87]  | 1.47 [1.20; 1.81] | 1.01 [0.80; 1.28]   |
| Anti-platelet agents                   | yes            | 0.91 [0.72; 1.17] | 1.01 [0.68; 1.52]  | 1.06 [0.86; 1.33] | 1.13 [0.86; 1.49]   |
| Beta-blockers                          | yes            | 0.96 [0.70; 1.34] | 1.88 [1.26; 2.80]  | 1.03 [0.76; 1.39] | 1.42 [1.06; 1.89]   |
| MRA                                    | yes            | 1.12 [0.74; 1.70] | 0.61 [0.30; 1.23]  | 0.63 [0.42; 0.96] | 0.66 [0.42; 1.03]   |
| regional center                        | AA             | 1.21 [0.82; 1.78] | 0.77 [0.42; 1.41]  | 1.12 [0.80; 1.57] | 0.80 [0.54; 1.17]   |
|                                        | BE             | 0.98 [0.62; 1.55] | 1.01 [0.54; 1.89]  | 0.74 [0.48; 1.13] | 0.58 [0.34; 0.96]   |
|                                        | FR             | 1.03 [0.64; 1.67] | 0.65 [0.30; 1.40]  | 0.83 [0.54; 1.27] | 0.56 [0.32; 0.95]   |
|                                        | HA             | 1.45 [0.98; 2.16] | 0.27 [0.10; 0.78]  | 0.59 [0.38; 0.93] | 0.43 [0.24; 0.75]   |
|                                        | HE             | 0.92 [0.64; 1.33] | 0.83 [0.48; 1.40]  | 0.92 [0.66; 1.26] | 0.83 [0.58; 1.17]   |
|                                        | JE             | 0.78 [0.50; 1.23] | 0.97 [0.54; 1.75]  | 0.91 [0.62; 1.31] | 0.86 [0.58; 1.30]   |
|                                        | MU             | 0.93 [0.66; 1.31] | 0.93 [0.60; 1.46]  | 1.16 [0.88; 1.51] | 0.77 [0.56; 1.06]   |
|                                        | WU             |                   |                    |                   |                     |

**Results are presented as hazard ratios with 95%-confidence intervals given in parentheses**

<sup>a</sup> model A: all models adjusted for age, gender,

<sup>b</sup> model B: all models adjusted for age, gender, BMI, systolic BP, LDL cholesterol, diabetes, eGFR, UACR, smoking, hs-CRP, preexisting CVD, history of heart failure, CV medication, i.e. use of statins, RASi, anti-platelet agents, beta-blockers, and mineralocorticoid receptor antagonists and regional center.

<sup>c</sup> SD Copeptin 11.7 pmol/l (whole population),

<sup>d</sup> SD for MR-proANP 109.04 pmol/l (whole population),

<sup>e</sup> SD for NT-proBNP 1073.4 pg/ml (whole population)
